# Supplementary material for: Switching from Aromatase Inhibitors to Dual Targeting Flavonoid-Based Compounds for Breast Cancer Treatment
Source: MDPI journal article supplement (doi:10.3390/molecules28073047), 2023-03-29
Supplement: s1 [file s1]

## Supplementary Materials

### Switching from Aromatase Inhibitors to Dual Targeting Flavonoid-Based Compounds for Breast Cancer Treatment

Silvia Gobbi <sup>1,\*</sup>, Silvia Martini <sup>2</sup>, Riccardo Rozza <sup>3</sup>, Angelo Spinello <sup>4</sup>, Jessica Caciolla <sup>1</sup>, Angela Rampa <sup>1</sup>, Federica Belluti <sup>1</sup>, Nadia Zaffaroni <sup>2</sup>, Alessandra Magistrato <sup>3</sup> and Alessandra Bisi <sup>1,\*</sup>

<sup>1</sup>*Department of Pharmacy and Biotechnology, Alma Mater Studiorum-University of Bologna, Via Belmeloro 6, 40126 Bologna, Italy*

<sup>2</sup>*Molecular Pharmacology Unit, Fondazione IRCSS Istituto Nazionale dei Tumori, via Amadeo 42, 20113, Milano, Italy*

<sup>3</sup>*National Research Council of Italy Institute of Materials (CNR-IOM) c/o SISSA, via Bonomea 265, 34136 Trieste, Italy*

<sup>4</sup>*Department of Biological, Chemical and Pharmaceutical Sciences and Technologies, University of Palermo, Viale delle Scienze, 90128 Palermo, Italy*

\* Correspondence: [silvia.gobbi@unibo.it](mailto:silvia.gobbi@unibo.it) (S.G.); [alessandra.bisi@unibo.it](mailto:alessandra.bisi@unibo.it) (A.B.)

### Contents

|                                                                        |           |
|------------------------------------------------------------------------|-----------|
| Figures S1 to S5: NMR spectra of compound <b>3b</b>                    | p. S2-S6  |
| Figures S6 to S9: NMR spectra of compounds <b>2a,b</b> and <b>4a,b</b> | p. S7-S10 |
| Figure S10: NMR spectra of intermediates <b>8a</b> and <b>8b</b>       | p.S11     |
| Table S1                                                               | p. S12    |

## NMR spectra of compound 3b

Figure S1.  $^1\text{H}$ -NMR

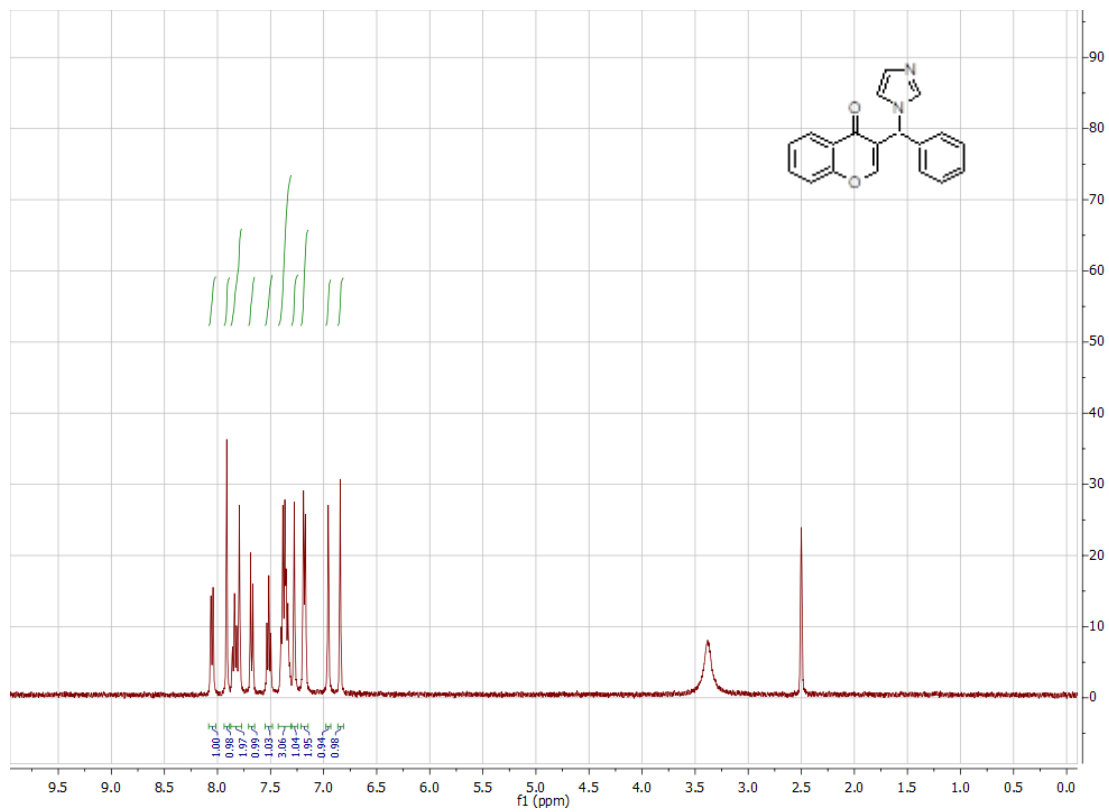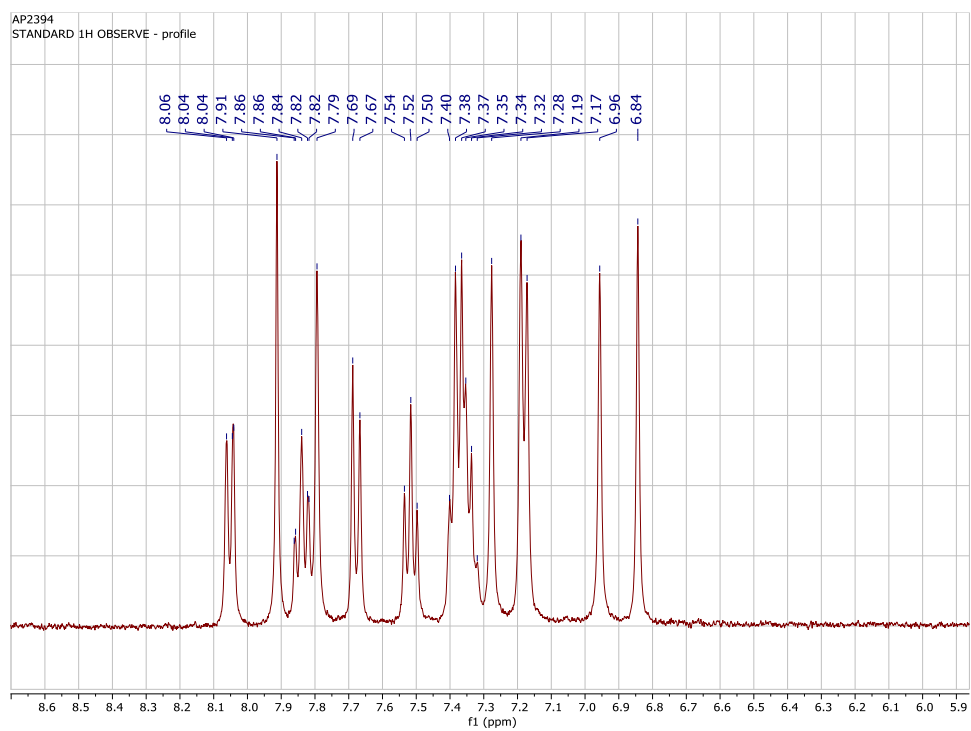

Expansion

**Figure S2.**  $^{13}\text{C}$ -NMR

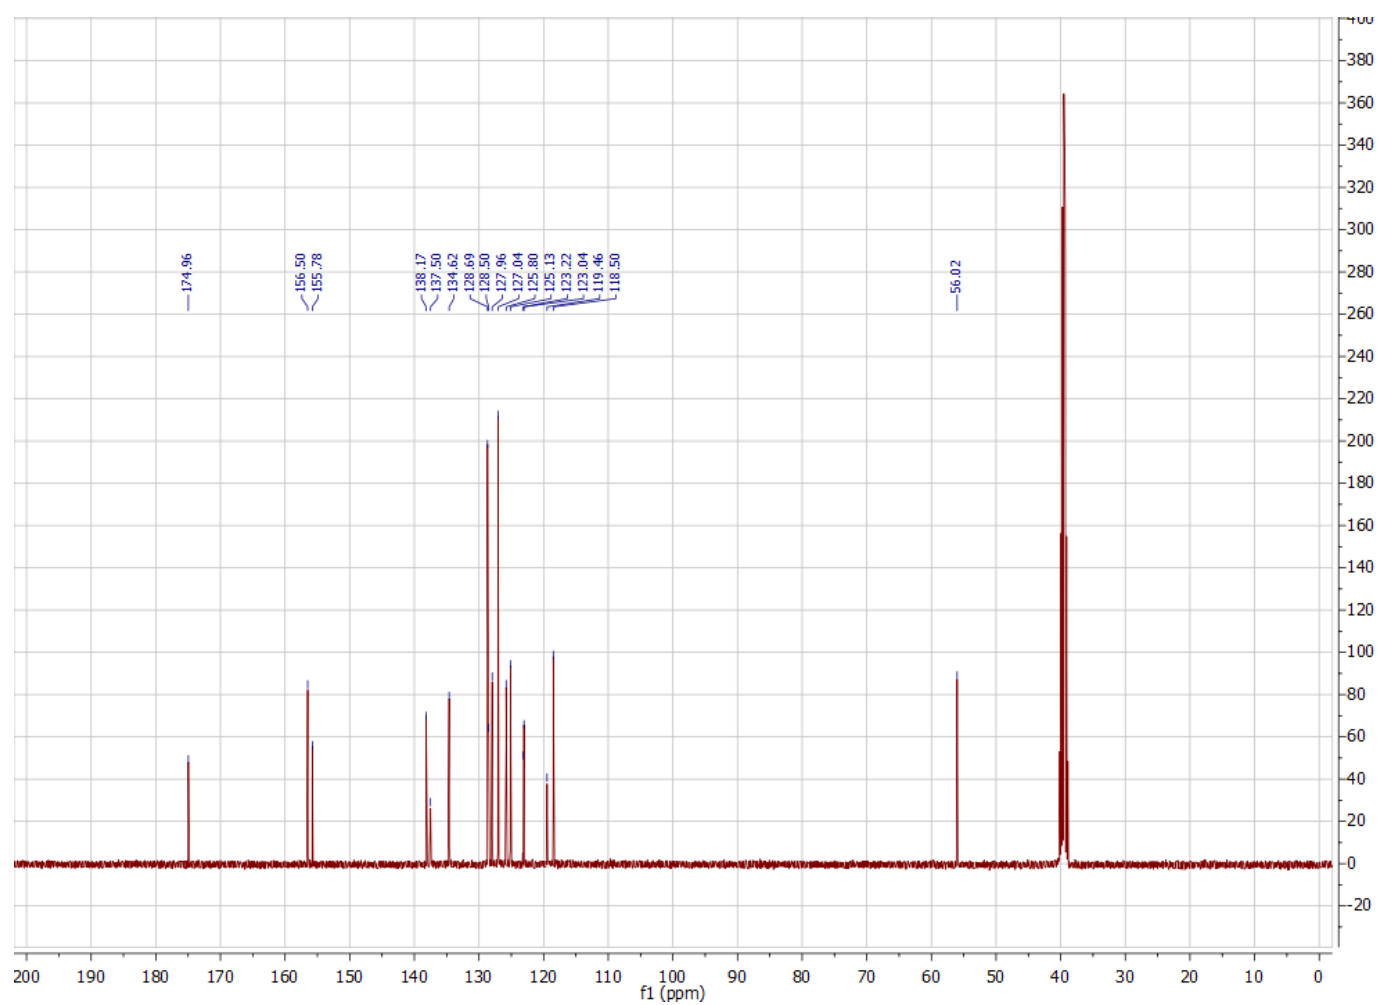

**Figure S3.**  $^1\text{H}$ - $^1\text{H}$  COSY

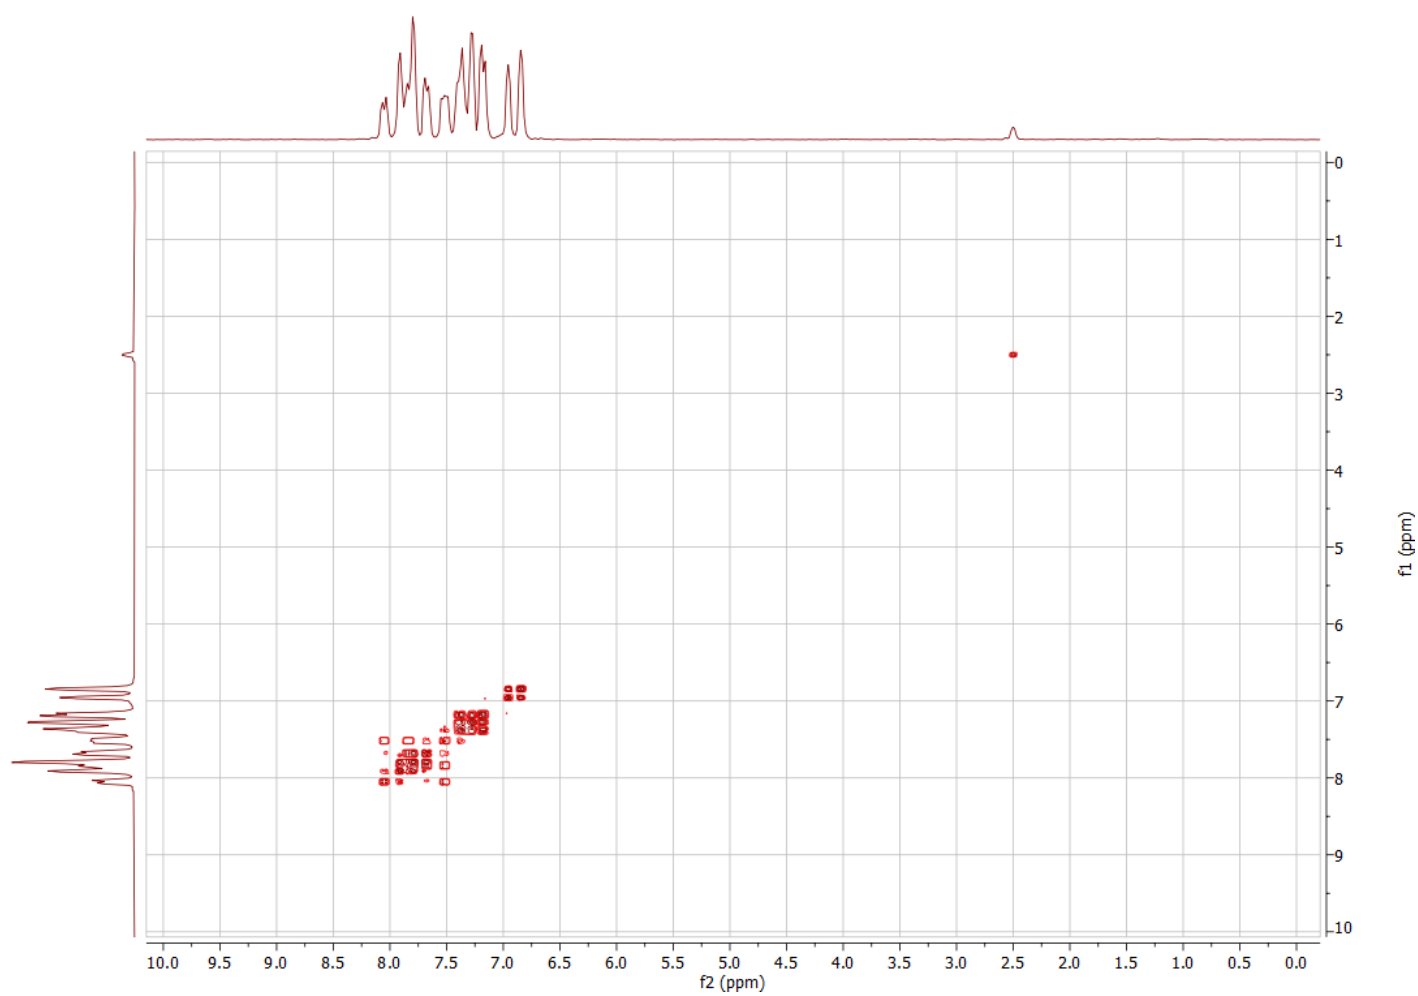

**Figure S4. HMBC**

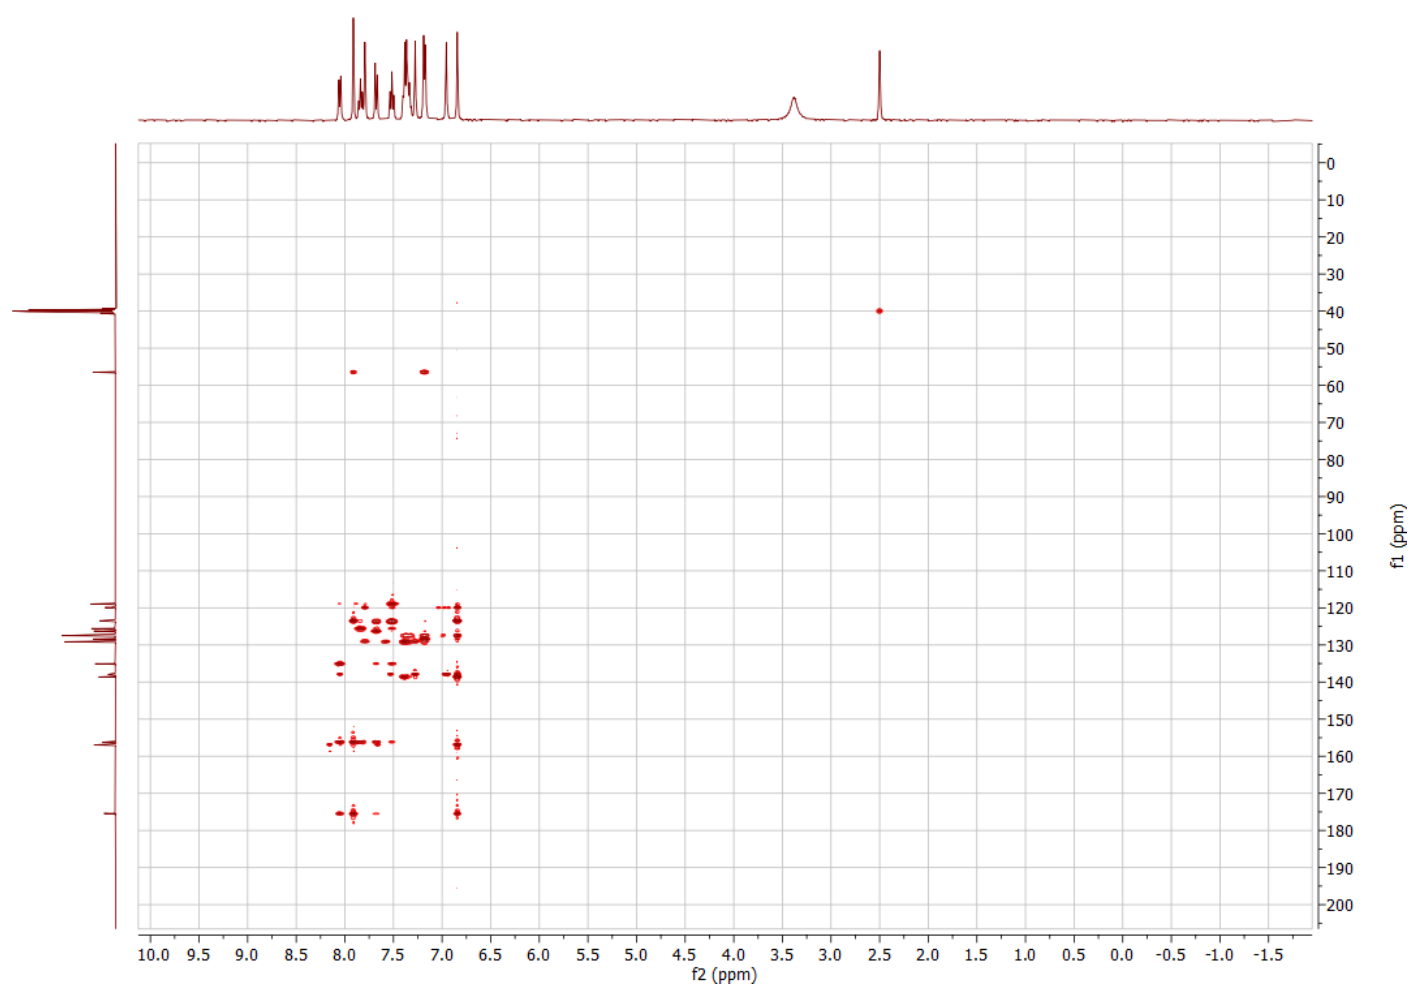

**Figure S5. HSQC**

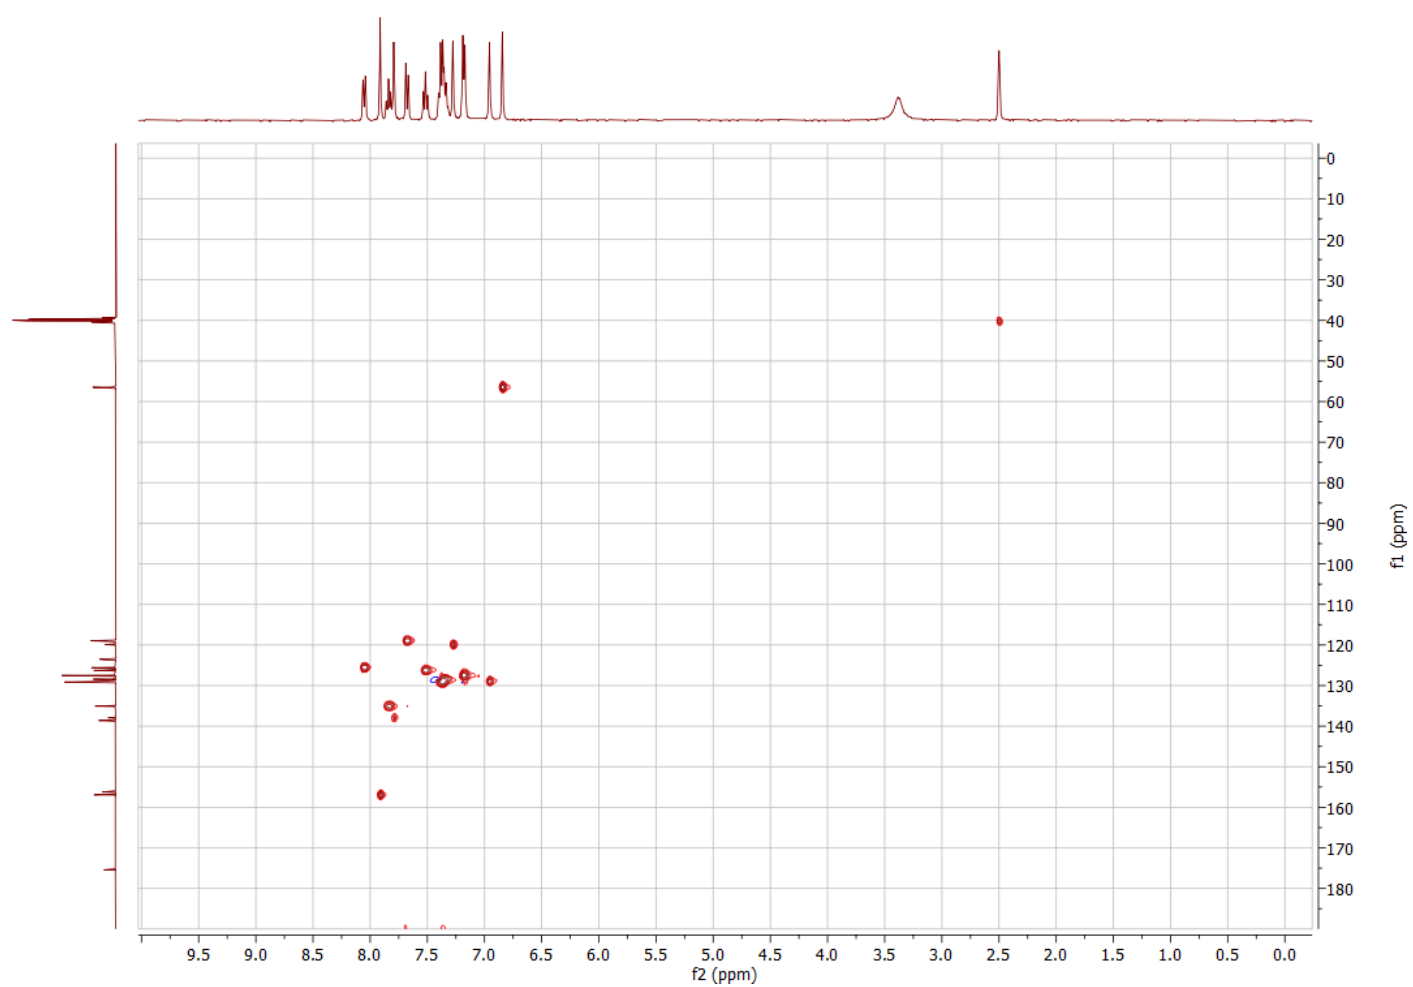

**Figure S6. NMR spectra of 2a**

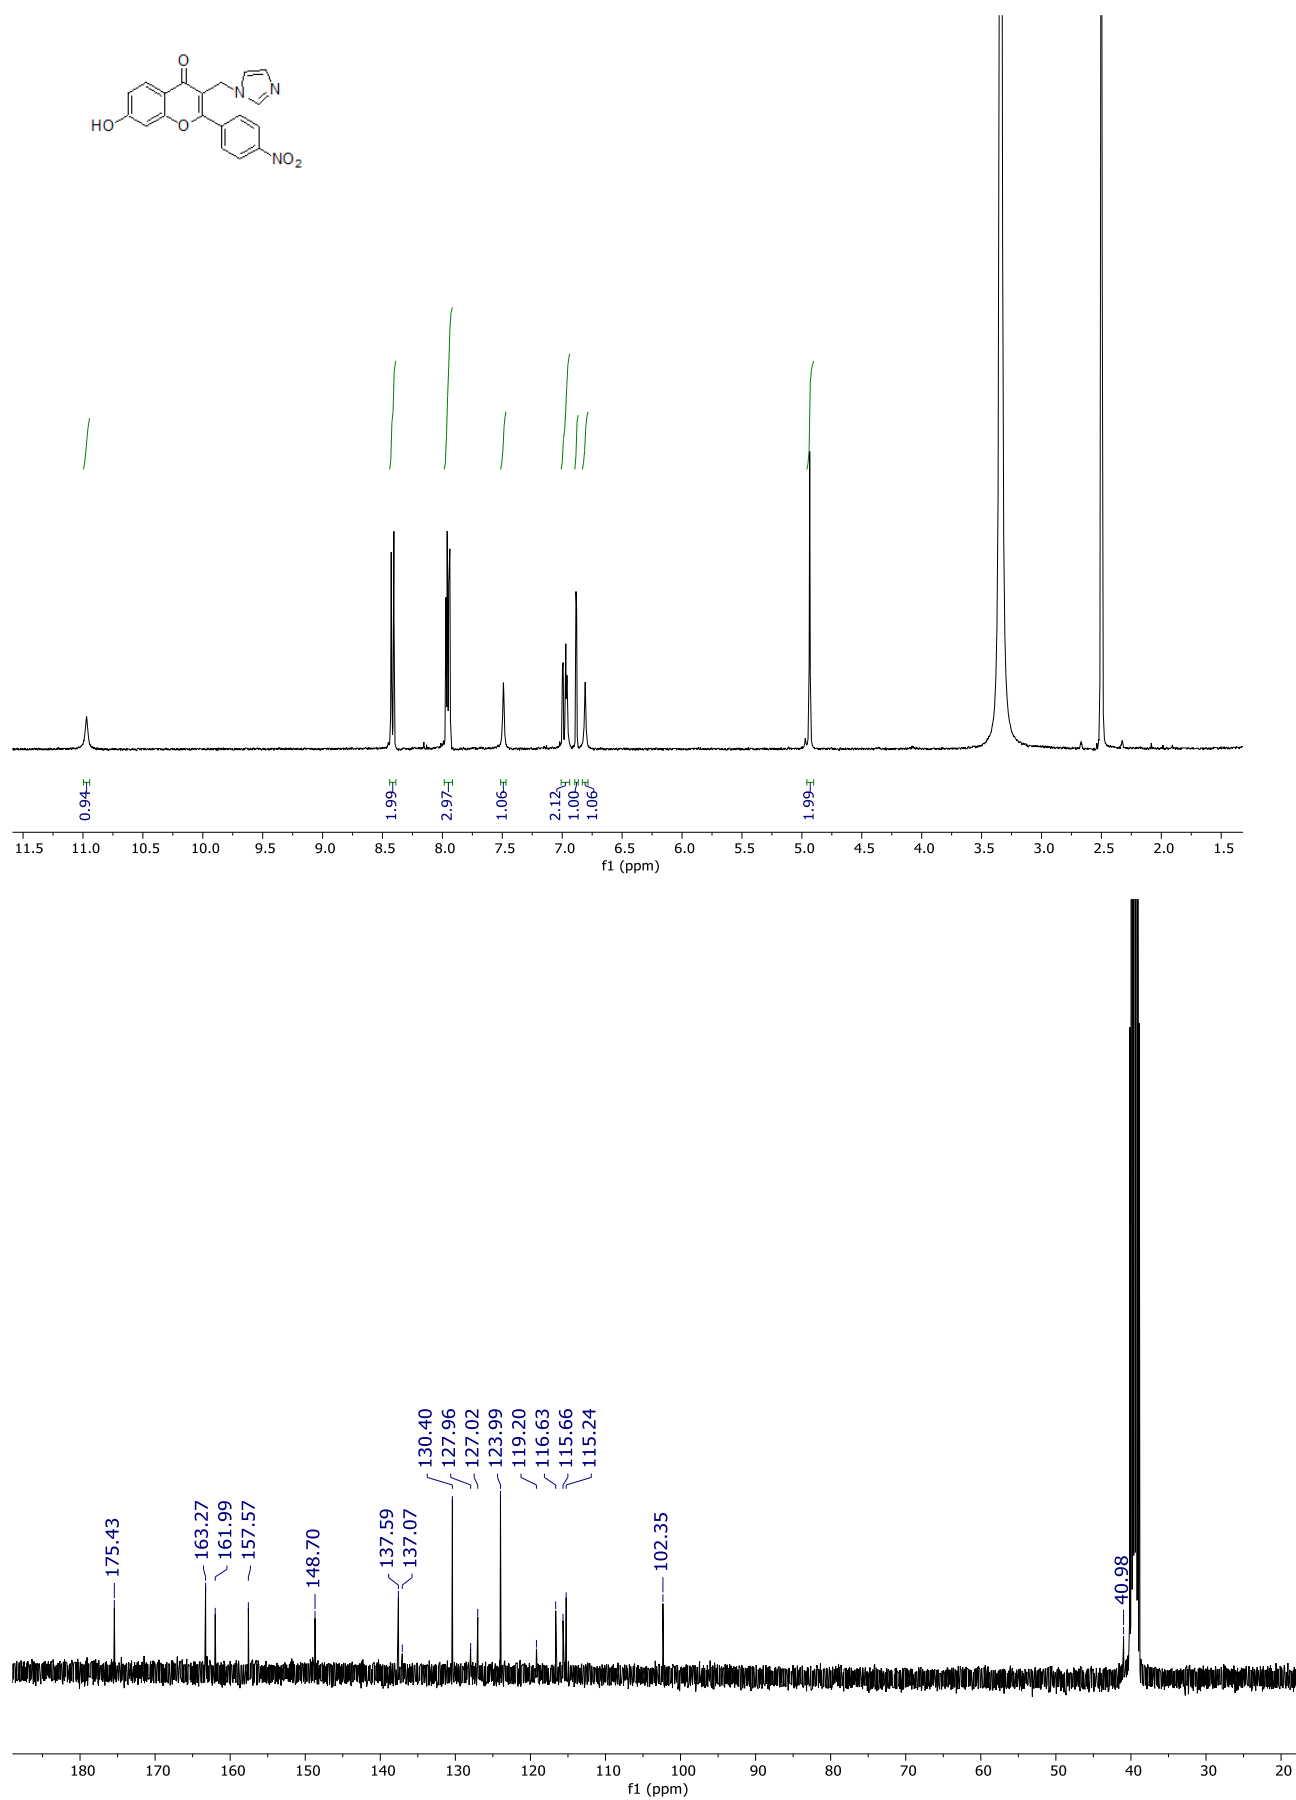

Figure S7. NMR spectra of 2b

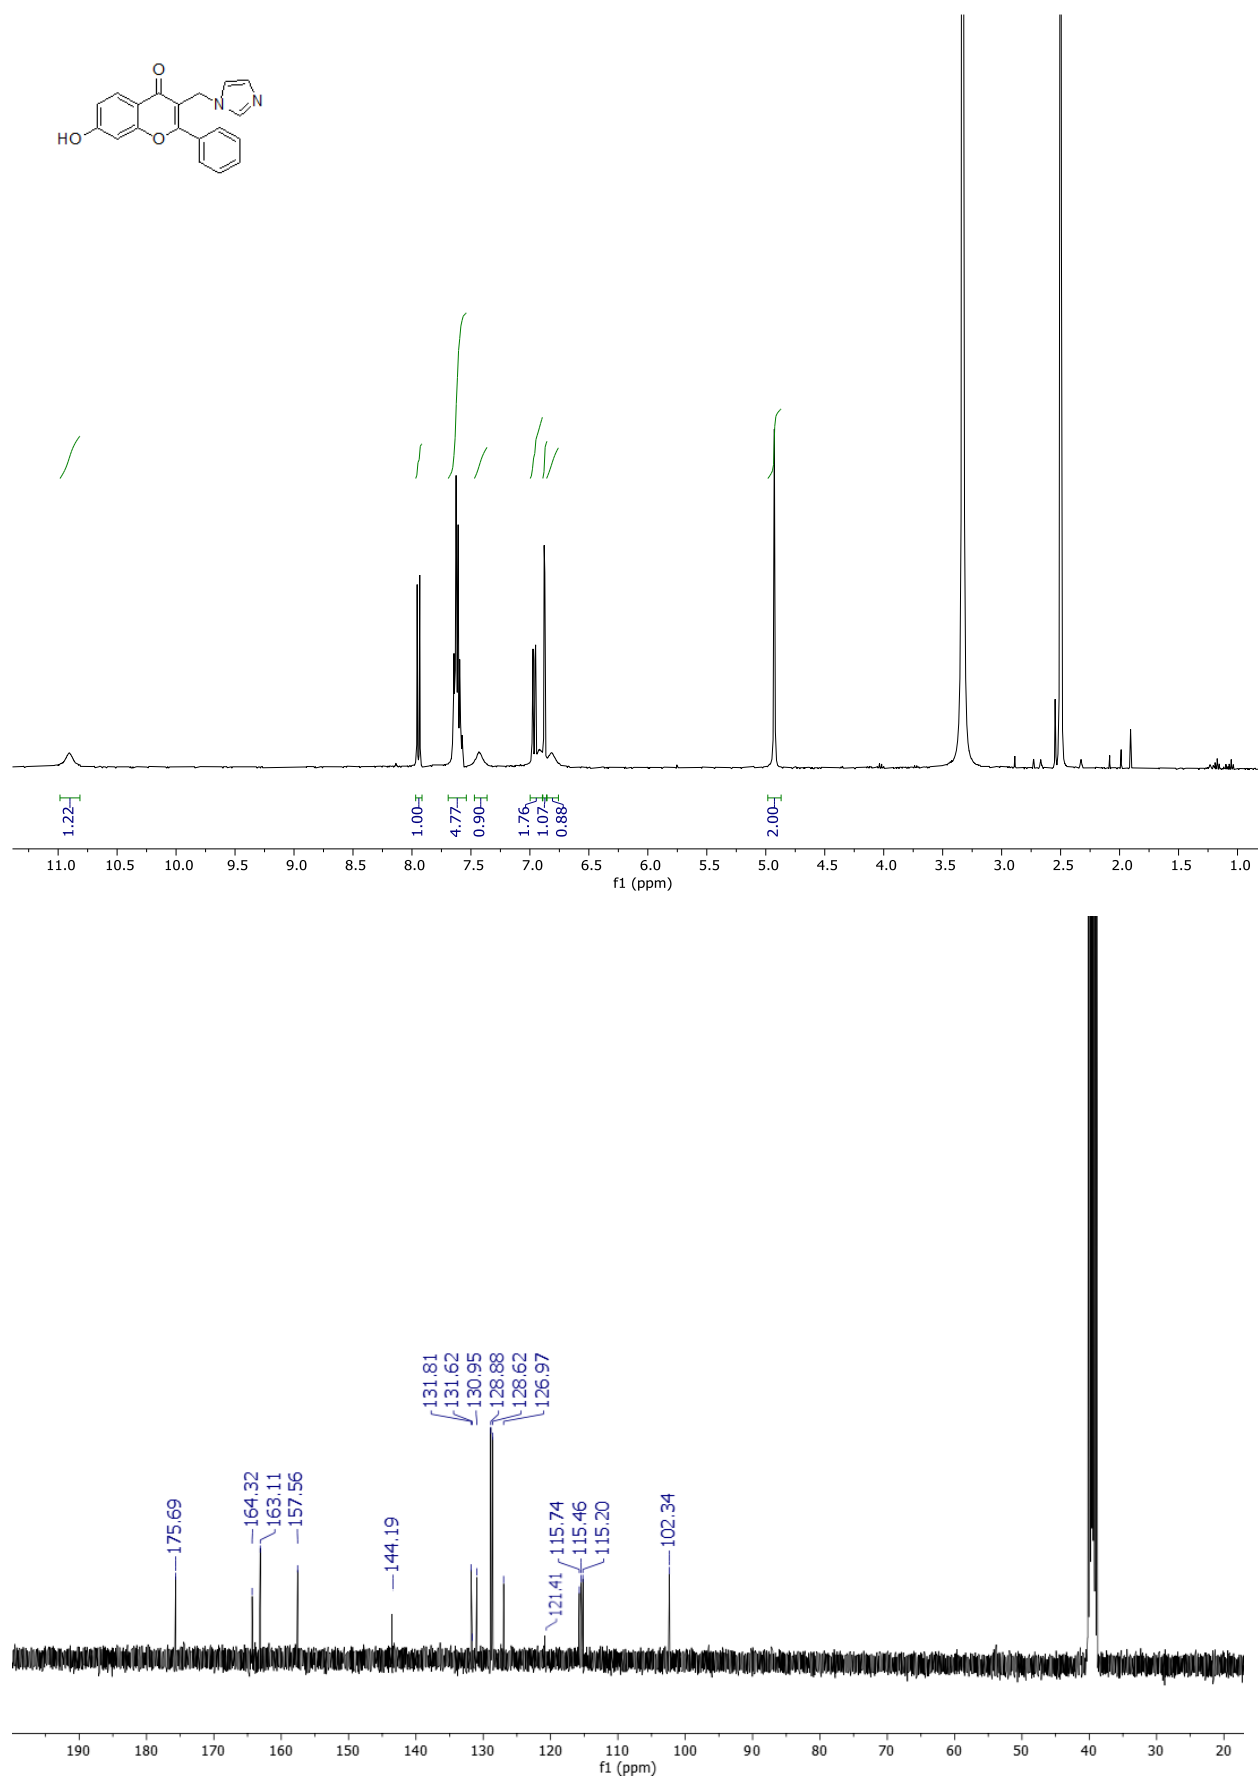



Figure S8. NMR spectra of 4a

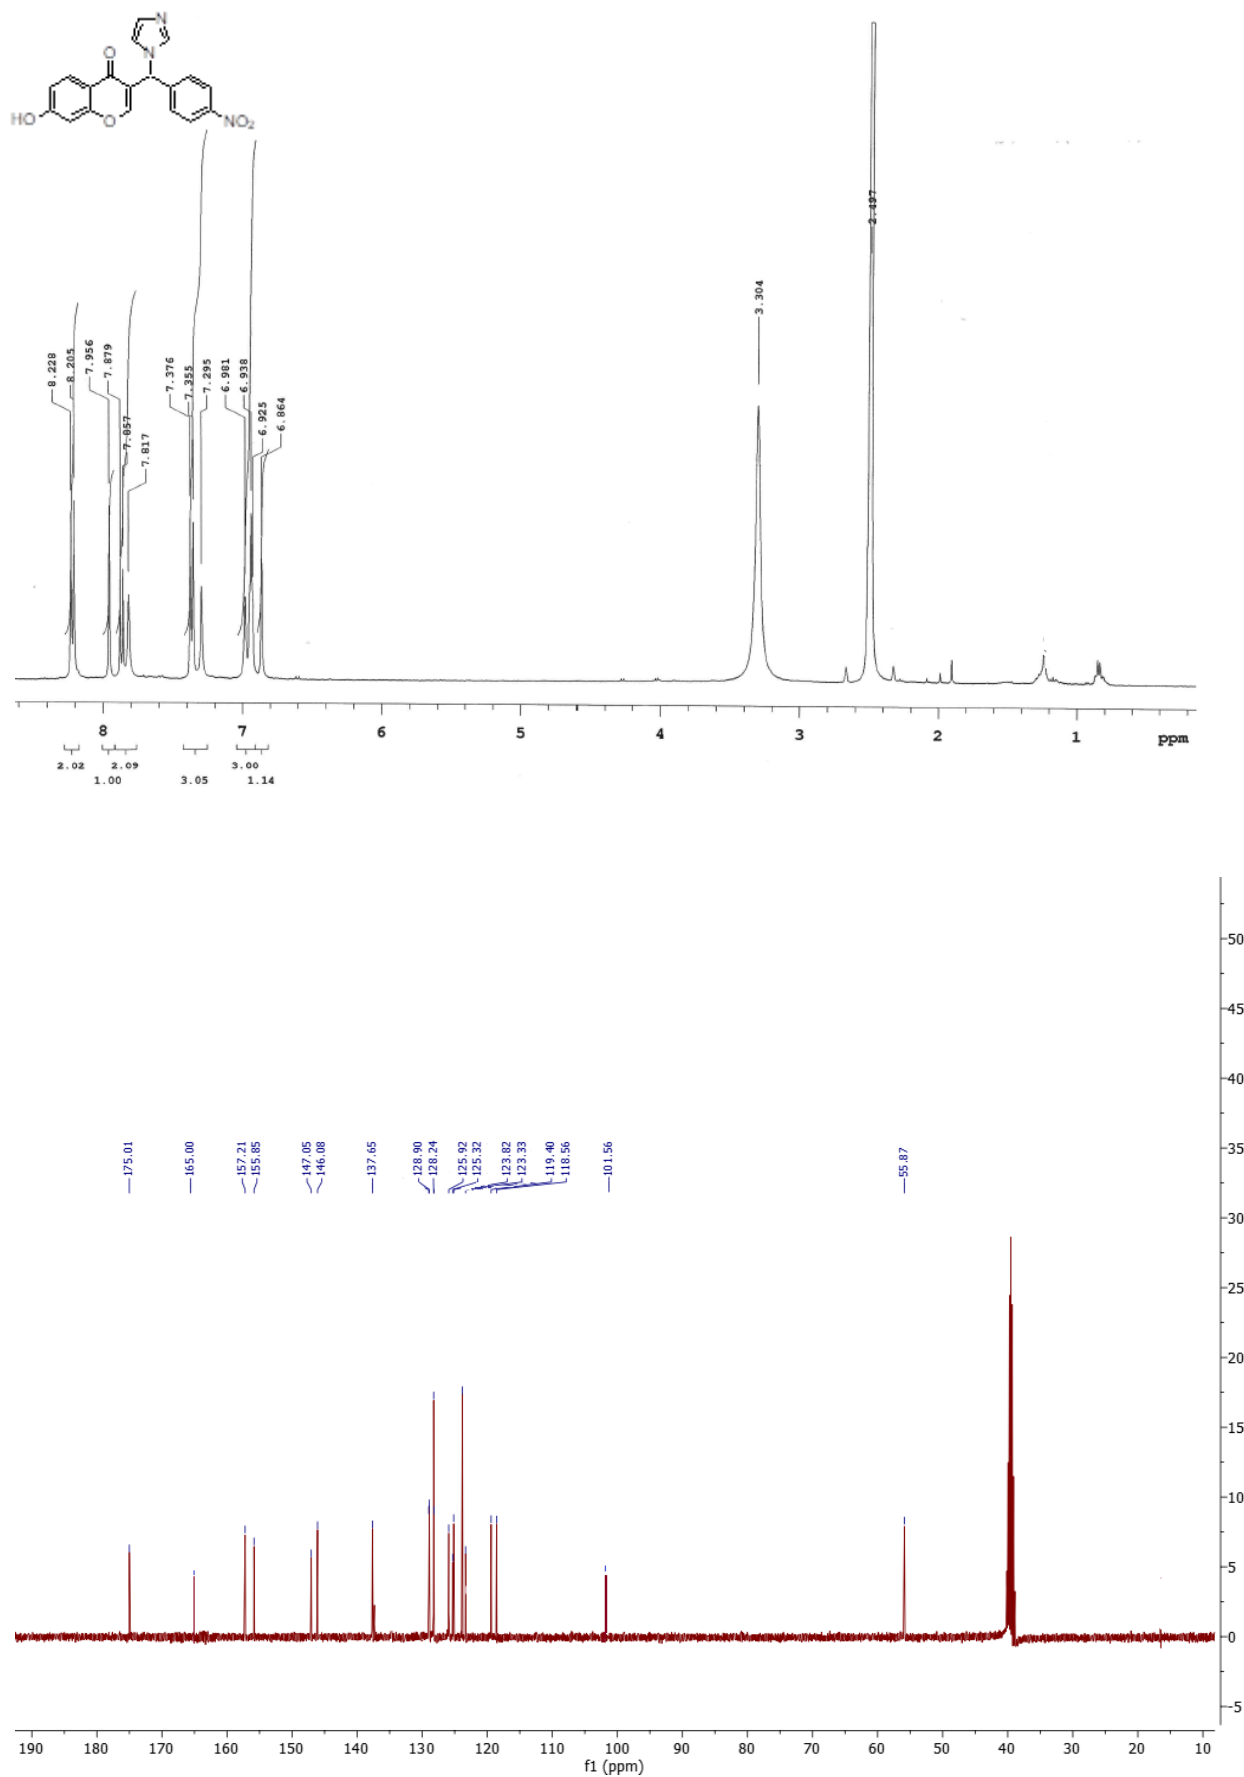

**Figure S9. NMR spectra of 4b**

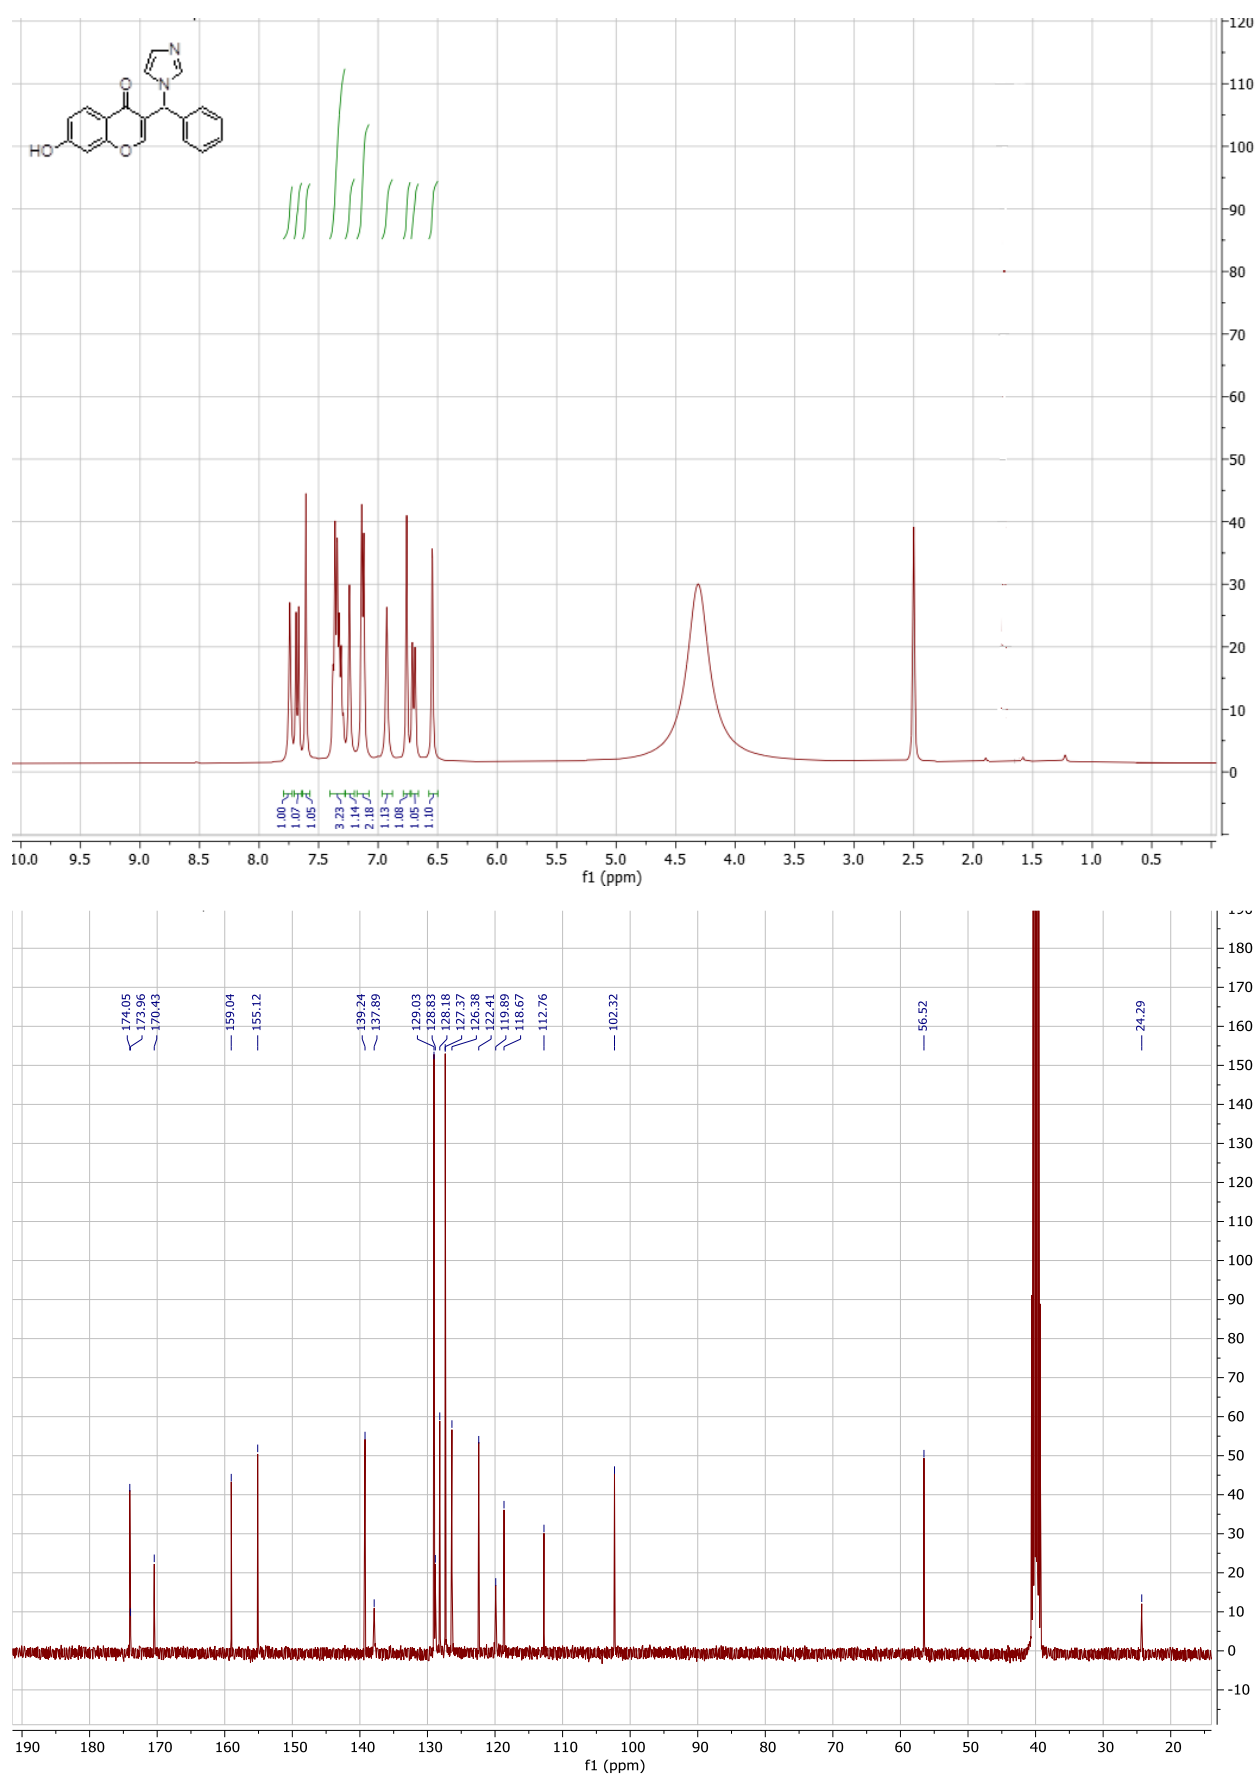

**Figure S10. NMR spectra of intermediates 8a and 8b**

**8a**

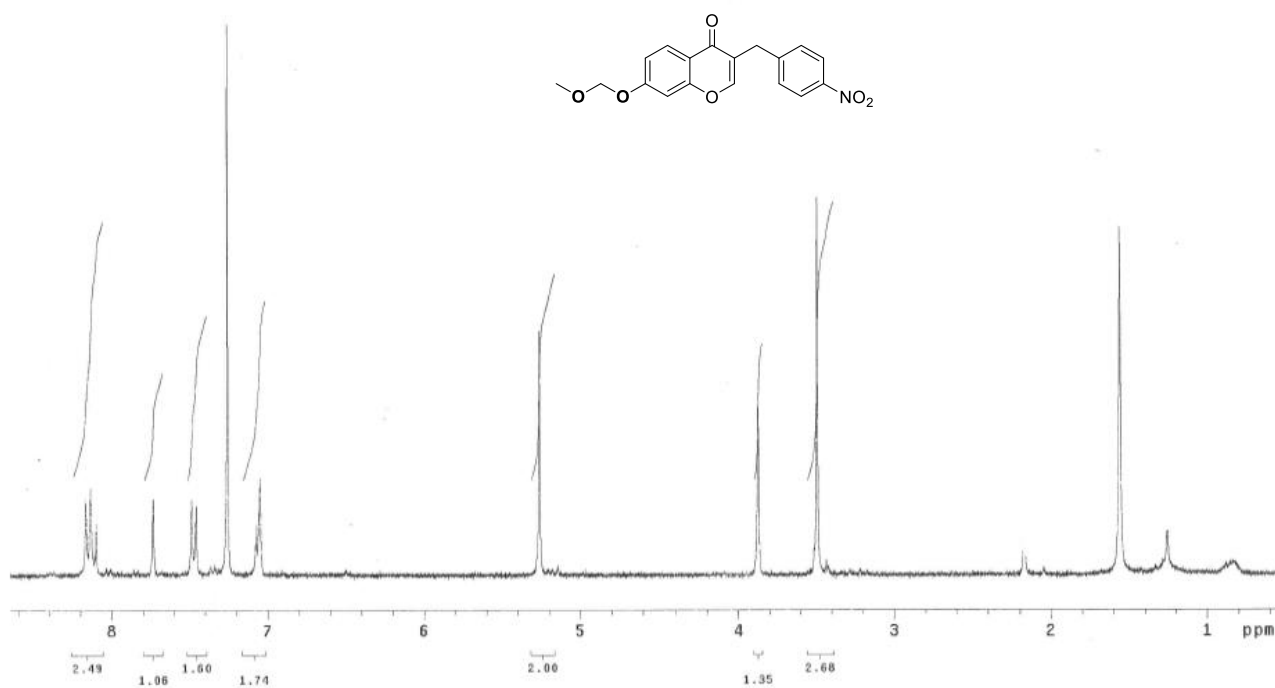

**8b**

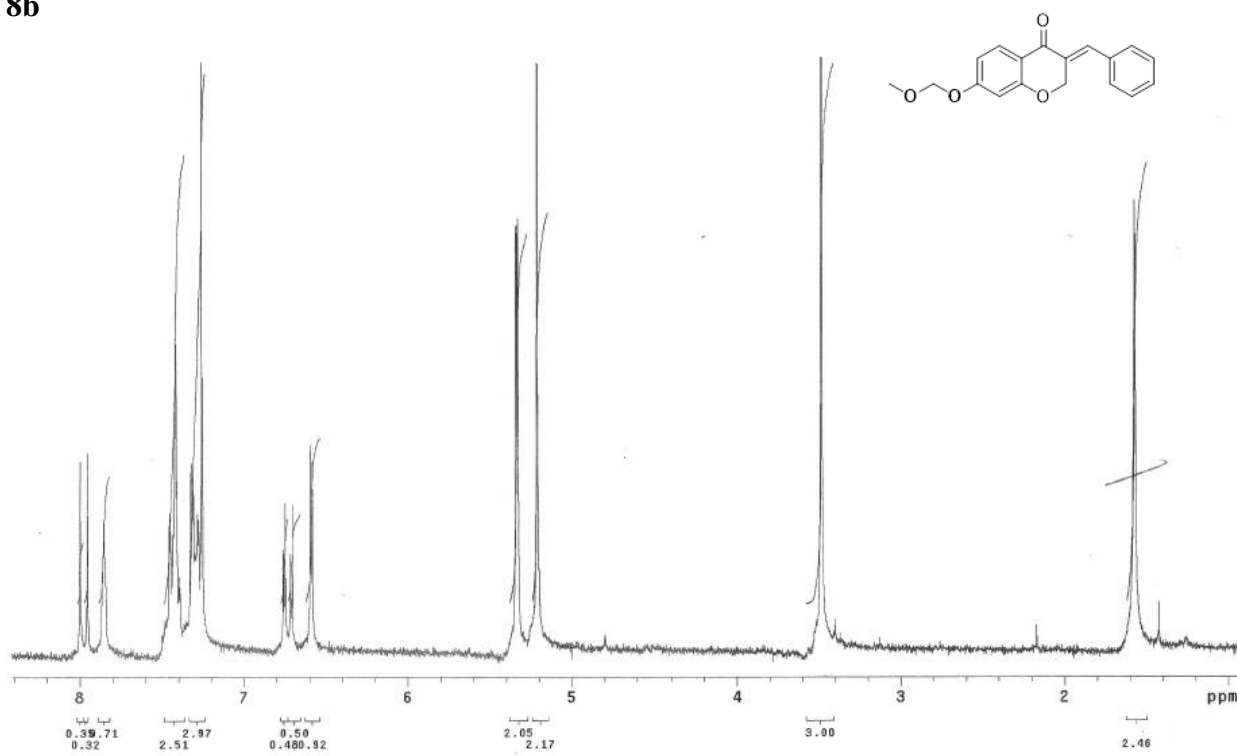

**Table S1.** Docking score (kcal/mol) to Estrogen Receptor  $\alpha$  for the studied compounds. For compounds **3a,b** and **4a,b** we considered the R and S enantiomer in the docking simulations.

| <b>Compound</b> | <b>Docking score</b> | <b>Docking score<br/>R</b> | <b>Docking score<br/>S</b> |
|-----------------|----------------------|----------------------------|----------------------------|
| <b>1a</b>       | -9.76                |                            |                            |
| <b>2a</b>       | -10.52               |                            |                            |
| <b>1b</b>       | -9.85                |                            |                            |
| <b>2b</b>       | -10.03               |                            |                            |
| <b>3a</b>       |                      | -9.53                      | -9.20                      |
| <b>3b</b>       |                      | -9.84                      | -8.68                      |
| <b>4a</b>       |                      | -10.49                     | -8.96                      |
| <b>4b</b>       |                      | -10.09                     | -10.38                     |
